# Supplementary material
Source: Springer Nature journal article supplement (https://www.springermedizin.de/resource/supplementary/12913_2011_2661_MOESM2_ESM.pdf/9531154)
Supplement: MOESM2 [file 9531154]

Density or Edge ( $\theta$ )

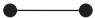

Two-Star ( $\sigma_2$ )

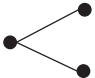

Three-Star ( $\sigma_3$ )

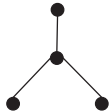

Triangle ( $\tau$ )

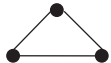

**(a)** Parameters for low-order models

Alt-K-Stars (AS)

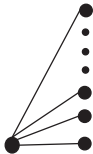

Alt-K-Triangles (AT)

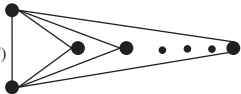

Alt-K-2-Paths (A2P)

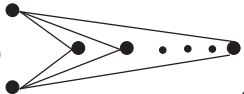

**(b)** Additional parameters for high-order models
